# Supplementary material
Source: publisher site journal article supplement (https://www.dovepress.com/article/425055)
Supplement: Supplementary file 1 [file get_supplementary_file.php]

Supplementary figures


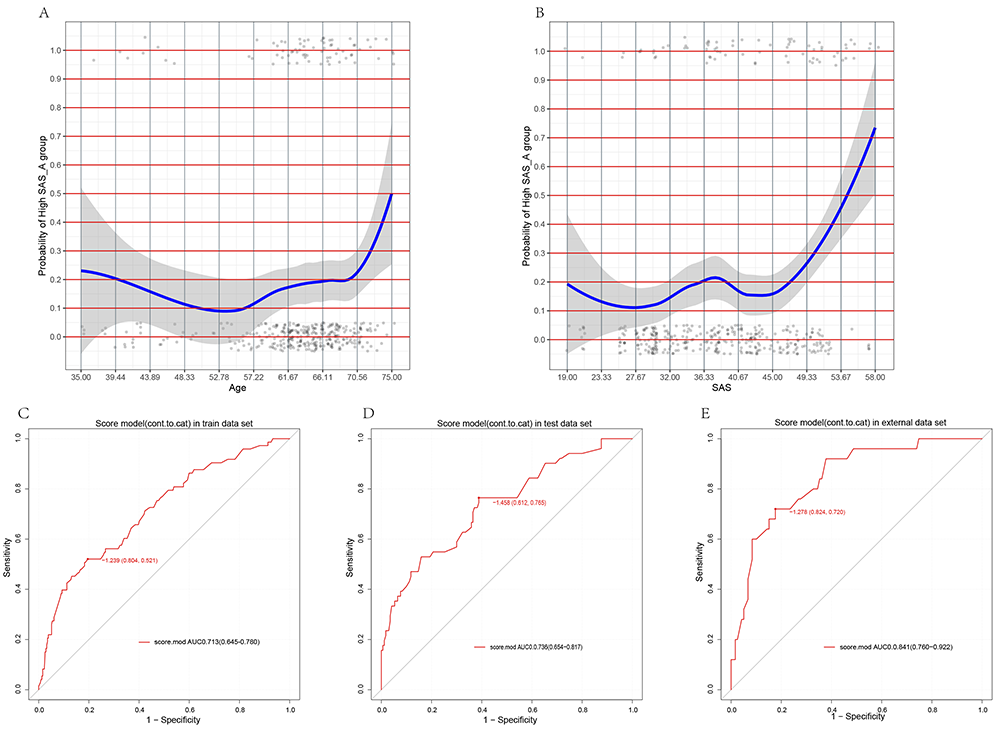


Supplementary figure 1. ATT Stage values were divided according to the curve smoothness, with SAS score divided into [19,23], (23,32], [32,37], [37,42], [42,49], [49,58]; age divided into [35,49], [49,57], [57,67], [67,75], (A, B). Factors were included in the regression model for analysis, and ROC curve was plotted (C D E).

Supplementary tables

Supplementary table 1 baseline characteristics of all data set ,training data set, validation data set, and external data set

|  | All data set | Train data set | Test data set | External data set |
| --- | --- | --- | --- | --- |
| Characteristic | N = 7501 | N = 3851 | N = 2211 | N = 1441 |
| Age | 62.9(7.6) | 62.6(7.8) | 62.6(7.5) | 63.9(7.1) |
| Income |  |  |  |  |
| Low | 394(53%) | 208(54%) | 115(52%) | 71(49%) |
| High | 356(47%) | 177(46%) | 106(48%) | 73(51%) |
| Operation |  |  |  |  |
| MRM | 420(56%) | 212(55%) | 129(58%) | 79(55%) |
| BCS | 330(44%) | 173(45%) | 92(42%) | 65(45%) |
| TNM |  |  |  |  |
| I | 304(41%) | 155(40%) | 91(41%) | 58(40%) |
| II-III | 446(59%) | 230(60%) | 130(59%) | 86(60%) |
| Marital |  |  |  |  |
| No spouse | 130(17%) | 63(16%) | 42(19%) | 25(17%) |
| Married | 620(83%) | 322(84%) | 179(81%) | 119(83%) |
| Family |  |  |  |  |
| Normal | 128(17%) | 71(18%) | 34(15%) | 23(16%) |
| Good | 622(83%) | 314(82%) | 187(85%) | 121(84%) |
| Education |  |  |  |  |
| Below high school | 334(45%) | 172(45%) | 100(45%) | 62(43%) |
| High School and above | 416(55%) | 213(55%) | 121(55%) | 82(57%) |
| Religion |  |  |  |  |
| No religious affiliation | 654(87%) | 331(86%) | 197(89%) | 126(88%) |
| Have religious beliefs | 96(13%) | 54(14%) | 24(11%) | 18(12%) |
| SAS | 38.8(9.0) | 38.6(8.8) | 38.7(9.5) | 39.7(8.8) |
| SAS_A | 48.1(7.1) | 48.1(6.9) | 48.7(6.8) | 47.5(7.8) |
| Events |  |  |  |  |
| No events | 581(77%) | 306(79%) | 173(78%) | 102(71%) |
| Events | 169(23%) | 79(21%) | 48(22%) | 42(29%) |
| 1Mean(SD); n(%) | | | | |
